# Supplementary material for: Interstitial lung disease is a risk factor for ischaemic heart disease and myocardial infarction
Source: PubMed Central journal article supplement (PMC7282497; doi:10.1136/heartjnl-2019-315511), 2020-02-29
Supplement: heartjnl-2019-315511supp001.pdf [file heartjnl-2019-315511supp001.pdf]

Table S1: Risk of Ischaemic Heart Disease and Myocardial Infarction by Exposure Status Excluding Cardiac Sarcoidosis Cases (n=31)

|                                                                                                                                                                                                            | IHD                     |                         |                         | MI                      |                         |                         |
|------------------------------------------------------------------------------------------------------------------------------------------------------------------------------------------------------------|-------------------------|-------------------------|-------------------------|-------------------------|-------------------------|-------------------------|
|                                                                                                                                                                                                            | Male                    | Female                  |                         | Male                    | Female                  |                         |
|                                                                                                                                                                                                            | HR (95% CI)             | HR (95% CI)             |                         | HR (95% CI)             | HR (95% CI)             |                         |
| <b>ILD</b>                                                                                                                                                                                                 | <b>1.67 (1.40-1.98)</b> | <b>1.36 (1.03-1.79)</b> |                         | <b>1.54 (1.30-1.83)</b> | <b>1.49 (1.16-1.91)</b> |                         |
| <b>PS</b>                                                                                                                                                                                                  | 1.13 (0.79-1.63)        | 0.88 (0.55-1.41)        |                         | <b>1.50 (1.08-2.07)</b> | 0.89 (0.56-1.42)        |                         |
| <b>PF</b>                                                                                                                                                                                                  | <b>1.81 (1.50-2.18)</b> | <b>1.67 (1.22-2.30)</b> |                         | <b>1.51 (1.25-1.83)</b> | <b>1.80 (1.36-2.38)</b> |                         |
| <b>Age</b>                                                                                                                                                                                                 |                         |                         |                         |                         |                         |                         |
|                                                                                                                                                                                                            | IHD                     |                         |                         | MI                      |                         |                         |
|                                                                                                                                                                                                            | ILD                     | PS                      | PF                      | ILD                     | PS                      | PF                      |
| <b>&lt;50</b>                                                                                                                                                                                              | 1.62 (0.93-2.83)        | 1.50 (0.84-2.68)        | 1.88 (0.56-6.32)        | 1.63 (0.98-2.72)        | <b>1.72 (1.02-2.91)</b> | 0.92 (0.22-3.89)        |
| <b>50-59</b>                                                                                                                                                                                               | 1.16 (0.74-1.83)        | 0.75 (0.42-1.36)        | <b>2.05 (1.13-3.71)</b> | 1.48 (0.95-2.29)        | 1.35 (0.80-2.28)        | 1.47 (0.79-2.74)        |
| <b>60-69</b>                                                                                                                                                                                               | <b>1.92 (1.46-2.52)</b> | 0.88 (0.51-1.53)        | <b>2.40 (1.79-3.22)</b> | <b>1.80 (1.35-2.38)</b> | 0.62 (0.32-1.23)        | <b>2.35 (1.74-3.16)</b> |
| <b>70-79</b>                                                                                                                                                                                               | <b>1.71 (1.35-2.17)</b> | 0.81 (0.36-1.82)        | <b>1.84 (1.45-2.35)</b> | <b>1.77 (1.40-2.23)</b> | 1.35 (0.72-2.55)        | <b>1.79 (1.41-2.29)</b> |
| <b>&gt;80</b>                                                                                                                                                                                              | 1.08 (0.73-1.61)        | 0.83 (0.11-6.18)        | 1.10 (0.73-1.64)        | 0.91 (0.64-1.28)        | 1.30 (0.39-4.39)        | 0.88 (0.62-1.27)        |
| All analyses adjusted for CKD, HTN, DM, HLD, BMI, exposure to smoking and alcohol, IMD, family history of cardiovascular disease and exposure to anti-hypertensive, anti-platelet and lipid-lowering drugs |                         |                         |                         |                         |                         |                         |
| CI=Confidence Interval; CKD=Chronic Kidney Disease; DM=Diabetes Mellitus; HLD=Hyperlipidaemia; HR= adjusted Hazard Ratio;                                                                                  |                         |                         |                         |                         |                         |                         |
| HTN=Hypertension; IHD=Ischaemic Heart Disease; ILD=Inflammatory Lung Disease; IMD=Index of Multiple Deprivation; MI=Myocardial Infarction;                                                                 |                         |                         |                         |                         |                         |                         |
| PF=Pulmonary Fibrosis; PS=Pulmonary Sarcoidosis                                                                                                                                                            |                         |                         |                         |                         |                         |                         |
