# Supplementary material for: Interstitial lung disease is a risk factor for ischaemic heart disease and myocardial infarction
Source: PubMed Central journal article supplement (PMC7282497; doi:10.1136/heartjnl-2019-315511), 2020-02-29
Supplement: heartjnl-2019-315511supp002.pdf [file heartjnl-2019-315511supp002.pdf]

Table S2: Risk of Ischaemic Heart Disease and Myocardial Infarction by Exposure Status Adjusted for Number of GP Consultations

|                                                                                                                                                                                                                                                                                                                                                                                                                                                                                                                                                            | IHD                     |                         |                         | MI                      |                         |                         |
|------------------------------------------------------------------------------------------------------------------------------------------------------------------------------------------------------------------------------------------------------------------------------------------------------------------------------------------------------------------------------------------------------------------------------------------------------------------------------------------------------------------------------------------------------------|-------------------------|-------------------------|-------------------------|-------------------------|-------------------------|-------------------------|
|                                                                                                                                                                                                                                                                                                                                                                                                                                                                                                                                                            | Male                    | Female                  |                         | Male                    | Female                  |                         |
|                                                                                                                                                                                                                                                                                                                                                                                                                                                                                                                                                            | HR (95%CI)              | HR (95%CI)              |                         | HR (95%CI)              | HR (95%CI)              |                         |
| <b>ILD</b>                                                                                                                                                                                                                                                                                                                                                                                                                                                                                                                                                 | <b>1.95 (1.64-2.32)</b> | <b>1.58 (1.19-2.08)</b> |                         | <b>1.87 (1.57-2.22)</b> | <b>1.72 (1.34-2.22)</b> |                         |
| <b>PS</b>                                                                                                                                                                                                                                                                                                                                                                                                                                                                                                                                                  | 1.40 (0.97-2.01)        | 0.97 (0.61-1.55)        |                         | <b>2.00 (1.45-2.75)</b> | 0.95 (0.59-1.51)        |                         |
| <b>PF</b>                                                                                                                                                                                                                                                                                                                                                                                                                                                                                                                                                  | <b>2.06 (1.71-2.48)</b> | <b>1.97 (1.43-2.72)</b> |                         | <b>1.75 (1.44-2.12)</b> | <b>2.16 (1.63-2.86)</b> |                         |
| <b>Age</b>                                                                                                                                                                                                                                                                                                                                                                                                                                                                                                                                                 |                         |                         |                         |                         |                         |                         |
|                                                                                                                                                                                                                                                                                                                                                                                                                                                                                                                                                            | IHD                     |                         |                         | MI                      |                         |                         |
|                                                                                                                                                                                                                                                                                                                                                                                                                                                                                                                                                            | ILD                     | PS                      | PF                      | ILD                     | PS                      | PF                      |
| <b>&lt;50</b>                                                                                                                                                                                                                                                                                                                                                                                                                                                                                                                                              | 1.73 (0.98-3.06)        | 1.57 (0.87-2.84)        | 2.10 (0.61-7.29)        | <b>1.84 (1.11-3.07)</b> | <b>1.94 (1.15-3.28)</b> | 0.92 (0.21-4.06)        |
| <b>50-59</b>                                                                                                                                                                                                                                                                                                                                                                                                                                                                                                                                               | 1.42 (0.90-2.28)        | 0.91 (0.50-1.67)        | <b>2.39 (1.31-4.36)</b> | <b>1.96 (1.25-3.06)</b> | <b>1.90 (1.12-3.24)</b> | 1.64 (0.86-3.10)        |
| <b>60-69</b>                                                                                                                                                                                                                                                                                                                                                                                                                                                                                                                                               | <b>2.17 (1.65-2.86)</b> | 0.96 (0.56-1.67)        | <b>2.74 (2.04-3.68)</b> | <b>2.10 (1.58-2.80)</b> | 0.69 (0.35-1.35)        | <b>2.80 (2.07-3.78)</b> |
| <b>70-79</b>                                                                                                                                                                                                                                                                                                                                                                                                                                                                                                                                               | <b>1.94 (1.53-2.46)</b> | 0.86 (0.38-1.94)        | <b>2.10 (1.64-2.68)</b> | <b>2.03 (1.61-2.57)</b> | 1.46 (0.78-2.75)        | <b>2.08 (1.63-2.66)</b> |
| <b>&gt;80</b>                                                                                                                                                                                                                                                                                                                                                                                                                                                                                                                                              | 1.30 (0.87-1.95)        | 0.82 (0.10-6.69)        | 1.33 (0.88-1.99)        | 1.09 (0.77-1.55)        | 1.18 (0.33-4.28)        | 1.09 (0.76-1.56)        |
| All analyses adjusted for CKD, HTN, DM, HLD, BMI, exposure to smoking and alcohol, IMD, family history of cardiovascular disease and exposure to anti-hypertensive, anti-platelet, lipid-lowering drugs and no of GP consultations<br>CI=Confidence Interval; CKD=Chronic Kidney Disease; DM=Diabetes Mellitus; HLD=Hyperlipidaemia; HR= adjusted Hazard Ratio; HTN=Hypertension; IHD=Ischaemic Heart Disease; ILD=Inflammatory Lung Disease; IMD=Index of Multiple Deprivation; MI=Myocardial Infarction; PF=Pulmonary Fibrosis; PS=Pulmonary Sarcoidosis |                         |                         |                         |                         |                         |                         |
